# Supplementary material for: Single-side and double-side swing behaviours of a flexible porous coordination polymer with a rhombic-lattice structure
Source: Royal Society of Chemistry journal article supplement (doi:10.1039/c9ce00227h), 2019-01-01
Supplement: c9ce00227h1.pdf [file c9ce00227h1.pdf]

**Electronic Supplementary Information (ESI) for**

**Single-side and double-side swing behaviours of a flexible porous coordination polymer with the rhombic-lattice structure**

Zong-Wen Mo, Ning-Yu Huang, Chao Wang, Zi-Ming Ye, Hao-Long Zhou, Dong-Dong Zhou, Rui-Biao Lin, Xiao-Ming Chen, Jie-Peng Zhang\*

MOE Key Laboratory of Bioinorganic and Synthetic Chemistry, School of Chemistry, Sun Yat-Sen University, Guangzhou 510275, China.

\*E-mail: zhangjp7@mail.sysu.edu.cn

## Experimental details.

**Materials and Methods.** All reagents and solvents were commercially purchased and used without further purification unless otherwise noted. The ligand Hpypz was synthesized according to the literature method [*Dalton Trans.* **2005**, 1598.]. Elemental analyses (C, H, N) were performed on a Perkin-Elmer 240 elemental analyzer, and all the samples were heated to remove the guest molecules before measurement. Thermogravimetry analyses were carried out on a TA-Q50 system under N<sub>2</sub> flow with a heating rate of 10 °C min<sup>-1</sup>. Power X-ray diffraction (PXRD) data were collected using a Bruker D8 advance X-ray powder diffractometer (Cu K $\alpha$ ,  $\lambda$  = 1.5418 Å) at room temperature with a scanning speed of 0.02 °/step and 0.2 sec/step. CO<sub>2</sub> sorption isotherms were measured with a Micromeritics ASAP 2020M instrument, in which the measurement temperature (195 K) was obtained by a dry-ice acetone bath. Before the sorption experiment, the as-synthesized samples were activated under high vacuum at 200 °C for 6 h.

**Syntheses.** [Zn<sub>2</sub>(pypz)<sub>2</sub>(bdc)]·guest (**1**). A mixture of Zn(NO<sub>3</sub>)<sub>2</sub>·6H<sub>2</sub>O (0.298 g, 1 mmol), H<sub>2</sub>bdc (0.088 g, 0.5 mmol), Hpypz (0.144 g, 1 mmol), and *N,N*-dimethylformide (DMF, 60 mL) was stirred for 30 min in air, then transferred and sealed in a 100-mL Teflon reactor, heated at 140 °C for 72 hours, and finally cooled to room temperature at a rate of 5 °C h<sup>-1</sup>. The obtained colorless crystals were filtered, washed by DMF, and dried under vacuum (yield *ca.* 90%). Anal. Calcd (%) for [Zn<sub>2</sub>(C<sub>8</sub>H<sub>4</sub>O<sub>4</sub>)(C<sub>8</sub>H<sub>6</sub>N<sub>3</sub>)<sub>2</sub>]<sub>2</sub>·2.7H<sub>2</sub>O (C<sub>24</sub>H<sub>21.4</sub>Zn<sub>2</sub>N<sub>6</sub>O<sub>6.7</sub>): C, 45.62; H, 3.41; N, 13.30. Found: C, 45.79; H, 3.13; N, 13.13. [Zn<sub>2</sub>(pypz)<sub>2</sub>(bdc)]·guest (**2**). The procedure was the same as for **1**, except that Zn(NO<sub>3</sub>)<sub>2</sub>·6H<sub>2</sub>O was replaced by Zn(CH<sub>3</sub>COO)<sub>2</sub>·2H<sub>2</sub>O (0.219 g, 1 mmol). Anal. Calcd (%) for [Zn<sub>2</sub>(C<sub>8</sub>H<sub>4</sub>O<sub>4</sub>)(C<sub>8</sub>H<sub>6</sub>N<sub>3</sub>)<sub>2</sub>]<sub>2</sub>·3.1H<sub>2</sub>O (C<sub>24</sub>H<sub>22.2</sub>Zn<sub>2</sub>N<sub>6</sub>O<sub>7.1</sub>): C, 45.11; H, 3.50; N, 13.15. Found: C, 45.32; H, 3.69; N, 12.81.

**Crystallography.** Single-crystal X-ray diffraction data were collected on an Oxford Gemini-S Ultra CCD-detector diffractometer with mirror-monochromated Cu K $\alpha$  radiation or a Rigaku XtaLAB P300DS single-crystal diffractometer by using graphite-monochromated Cu K $\alpha$  radiation. The structures were solved by the direct method and refined with the full-matrix least-squares method on  $F^2$  by the SHELXTL package. Anisotropic thermal parameters were used to refine all host-framework non-hydrogen atoms. The SQUEEZE routine implemented in PLATON program was used to remove the residual electron densities of disordered guests in **1** and **2**. Single crystals of **3** were obtained by heating the as-synthesized **1** or **2** to 200°C at the rate of 0.1 °C/min under N<sub>2</sub> atmosphere. Hydrogen atoms were generated geometrically. The crystal data and structure refinement results are listed in Table S1. CCDC 1869230, 1869231 and 1883610 contain the supplementary crystallographic data.

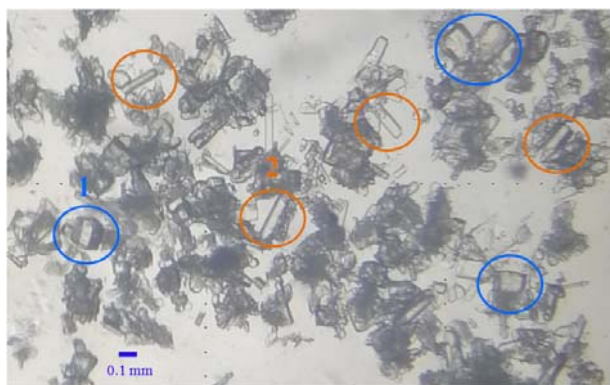

**Fig. S1.** An optical image of  $[\text{Zn}_2(\text{pypz})_2(\text{bdc})]$  crystals synthesized by using  $\text{Zn}(\text{NO}_3)_2 \cdot 6\text{H}_2\text{O}$  as metal salt and 5:1 DMF/ $\text{H}_2\text{O}$  as solvent (**1** and **2** are highlighted by blue and orange circles, respectively).

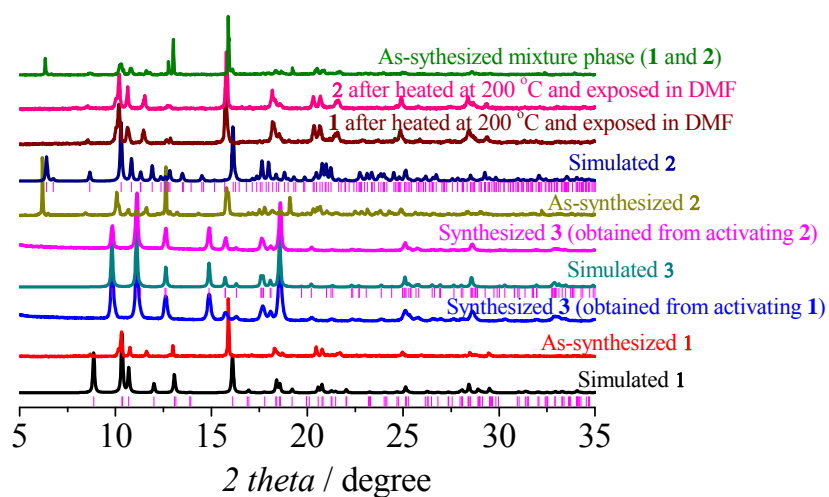

**Fig. S2.** PXRD patterns of **1**, **2**, and **3**.

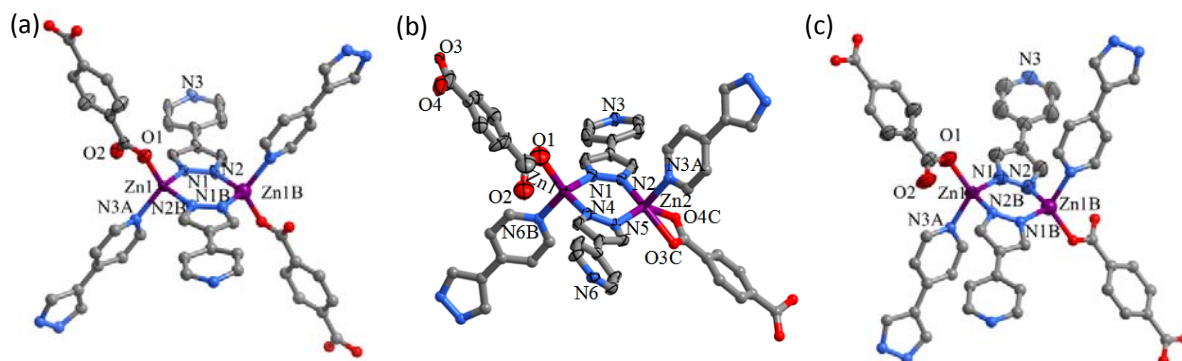

**Fig. S3.** Perspective views of the coordination environments of (a) **1** (symmetry codes: A =  $x, 1-y, -1/2+z$ ; B =  $3/2-x, 1/2-y, 1-z$ ; Zn1-O1 1.970(2) Å, Zn1...O2 2.688(2) Å, Zn1-N1 1.978(2) Å, Zn1-N2B 2.003(2) Å, Zn1-N3A: 2.026(2) Å), (b) **2** (A =  $3/2-x, y, 1/2+z$ ; B =  $1/2-x, y, -1/2+z$ ; C =  $1-x, -1/2+y, 1/2-z$ ; Zn1-O1 2.027(8) Å, Zn1...O2 2.603(9) Å, Zn1-N1 1.985(6) Å, Zn1-N4 1.997(5) Å, Zn1-N6B 2.035(5) Å, Zn2-O3C 2.176(6) Å, Zn2-O4C 2.238(6) Å, Zn2-N3A 2.059(5) Å, Zn2-N2 2.013(5) Å, Zn2-N5 2.017(4) Å) and (c) **3** (A =  $-1/2-x, 1/2-y, 1/2+z$ ; B =  $1-x, 1-y, 2-z$ ; Zn1-O1 1.910(3) Å; Zn1...O2 2.856(3) Å, Zn1-N1 1.981(4) Å; Zn1-N2B 1.989(3) Å, Zn1-N3A 2.045(4) Å). Hydrogen atoms are omitted for clarity, and thermal ellipsoids of independent atoms are drawn at 50% probability.

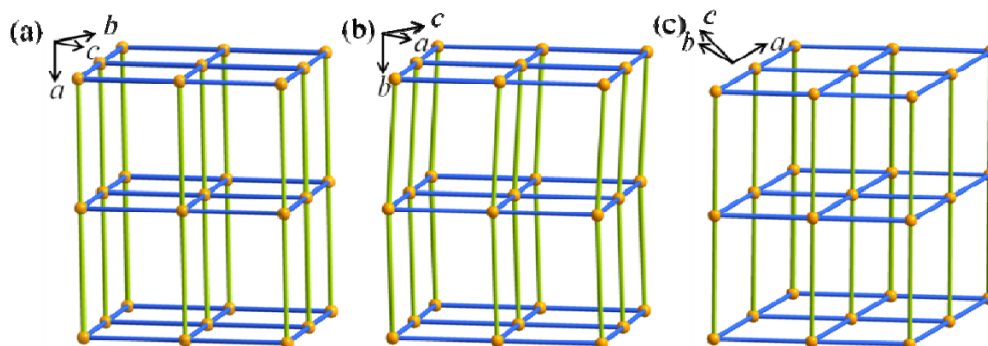

**Fig. S4.** Simplified framework topology of (a) **1**, (b) **2**, and (c) **3** (blue/green stick and yellow spheres represent  $\text{pypz}^-/\text{bdc}^{2-}$  ligands and  $[\text{Zn}_2(\text{Rpz})_2]$  units, respectively).

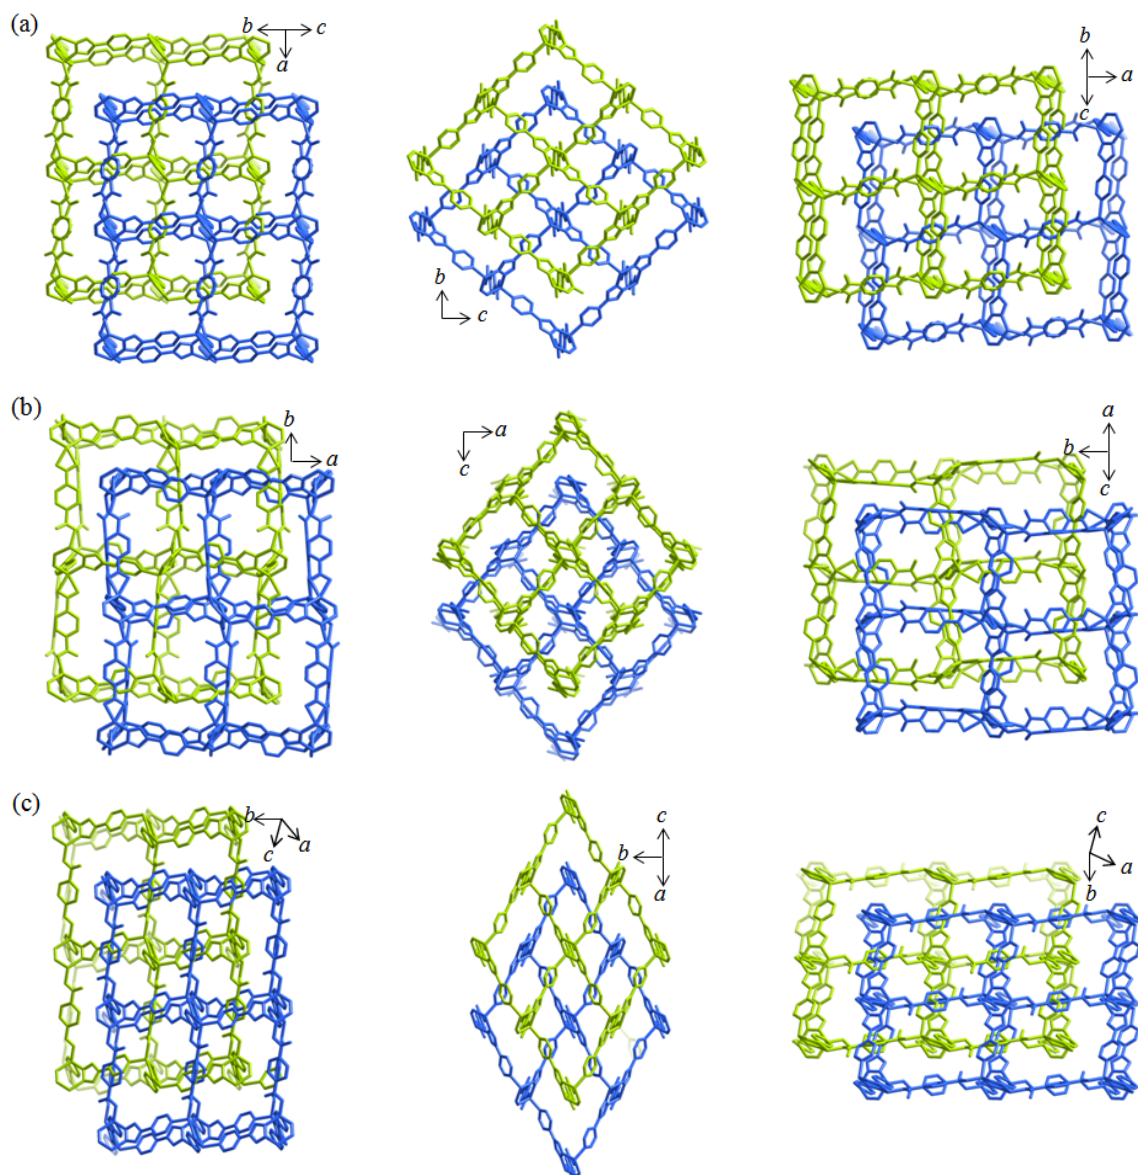

**Fig. S5.** 2-fold interpenetrated structures of (a) **1**, (b) **2**, and (c) **3** (two different colors are used to distinguish two independent networks) viewing along the three representing directions.

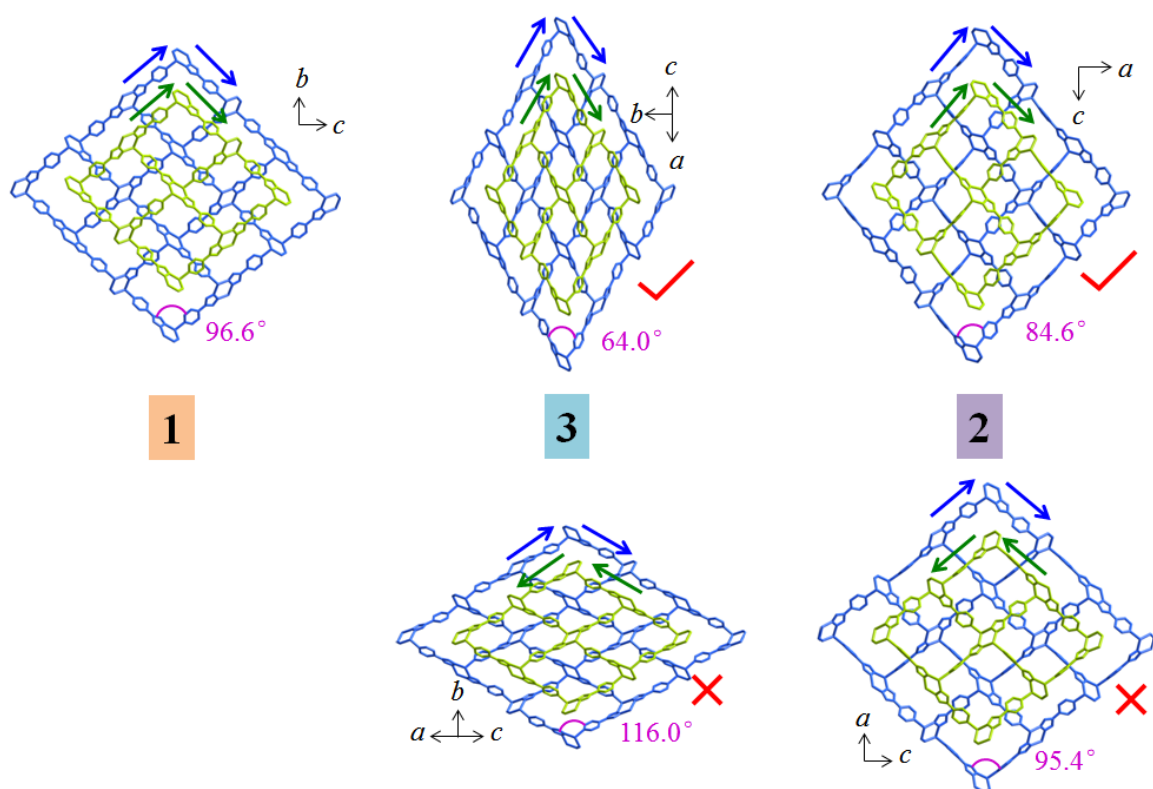

**Fig. S6.** Explanation of the selection/definition of  $\varphi$  (acute or obtuse) of the rhombic lattices in **1**, **2**, and **3**. The blue and green arrows highlight the orientations of the  $\text{pypz}^-$  ligands.

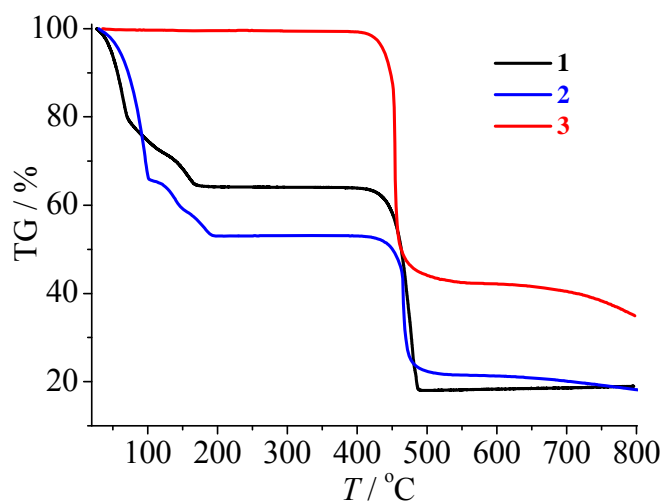

**Fig. S7.** Thermogravimetry curves of **1**, **2**, and **3**.

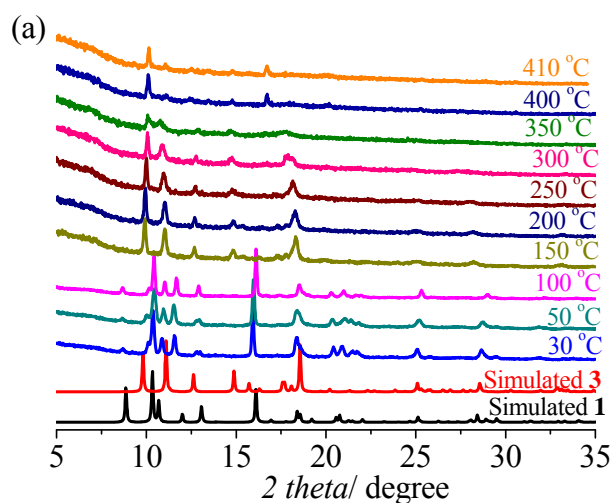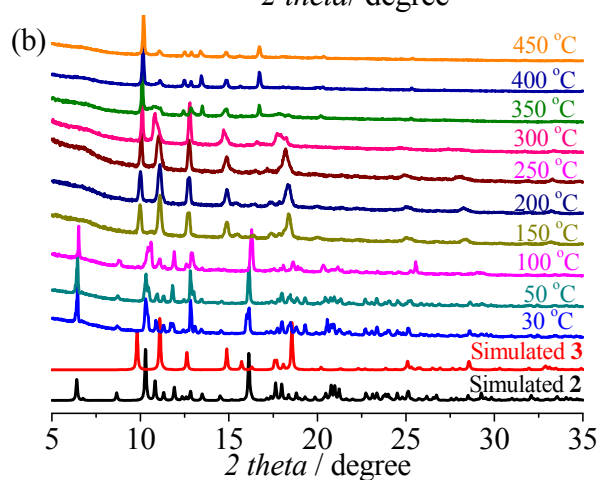

**Fig. S8.** Variable-temperature PXRD pattern of (a) **1** and (b) **2**.

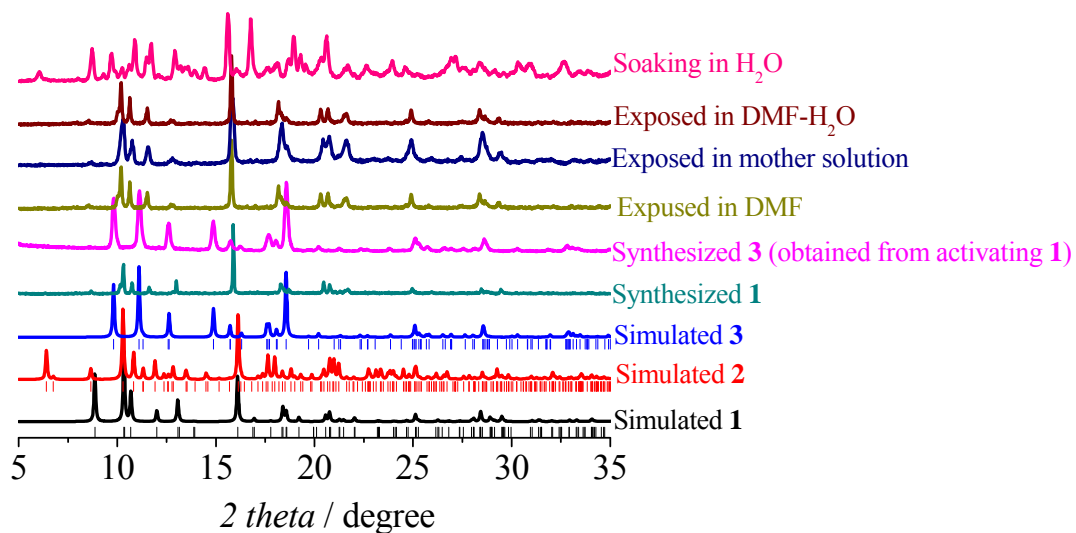

**Fig. S9.** PXRD patterns of **3** (obtained from **1**) after exposed in saturated vapor or immersed directly in the solvent.

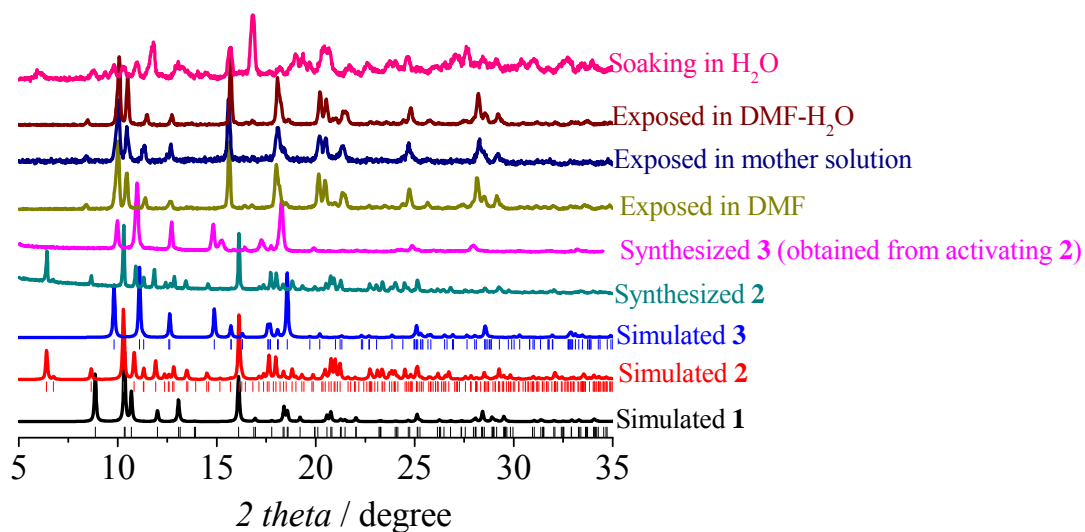

**Fig. S10.** PXRD patterns of **3** (obtained from **2**) after exposed in saturated vapor or immersed directly in the solvent.

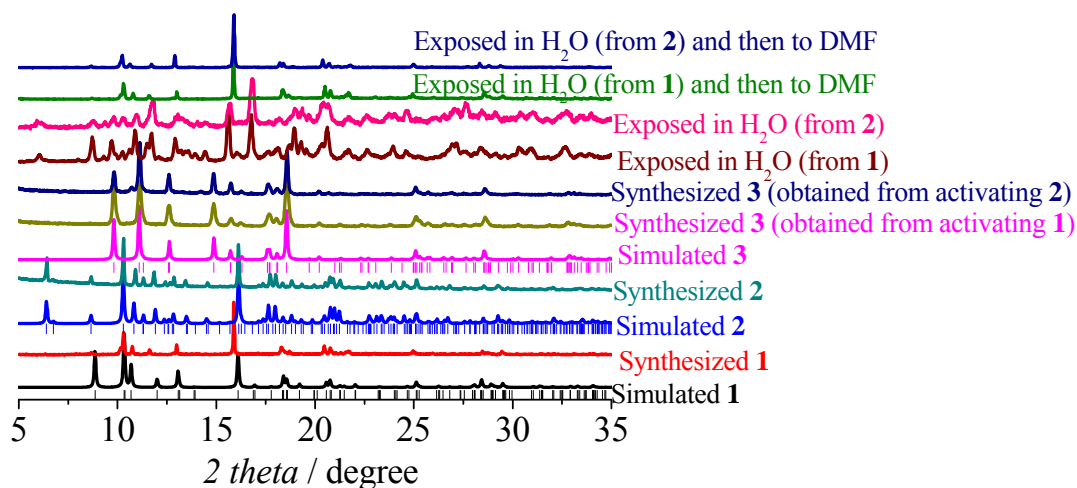

**Fig. S11.** PXRD patterns of **3** after exposed in saturated  $H_2O$  vapor and then exposed in DMF.



**Table S1.** Crystallographic data of **1**, **2** and **3**.

| Compound                                                           | <b>1</b>                                                        | <b>2</b>                                                        | <b>3</b> (obtained from activating <b>1</b> )                   | <b>3</b> (obtained from activating <b>2</b> )                   |
|--------------------------------------------------------------------|-----------------------------------------------------------------|-----------------------------------------------------------------|-----------------------------------------------------------------|-----------------------------------------------------------------|
| Formula                                                            | C <sub>12</sub> H <sub>8</sub> N <sub>3</sub> O <sub>2</sub> Zn | C <sub>12</sub> H <sub>8</sub> N <sub>3</sub> O <sub>2</sub> Zn | C <sub>12</sub> H <sub>8</sub> N <sub>3</sub> O <sub>2</sub> Zn | C <sub>12</sub> H <sub>8</sub> N <sub>3</sub> O <sub>2</sub> Zn |
| Formula weight                                                     | 291.58                                                          | 291.58                                                          | 291.58                                                          | 291.58                                                          |
| Temperature (K)                                                    | 150 (2)                                                         | 150 (2)                                                         | 298 (2)                                                         | 298 (2)                                                         |
| Crystal system                                                     | <i>C2/c</i>                                                     | <i>Pccn</i>                                                     | <i>P2<sub>1</sub>/n</i>                                         | <i>P2<sub>1</sub>/n</i>                                         |
| Space group                                                        | Monoclinic                                                      | Orthorhombic                                                    | Monoclinic                                                      | Monoclinic                                                      |
| <i>a</i> /Å                                                        | 13.5403(3)                                                      | 14.8436(5)                                                      | 11.2067(5)                                                      | 11.370(2)                                                       |
| <i>b</i> /Å                                                        | 14.7298(3)                                                      | 27.5747(8)                                                      | 11.2671(6)                                                      | 11.739(2)                                                       |
| <i>c</i> /Å                                                        | 16.5400(3)                                                      | 16.3246(5)                                                      | 11.6106(5)                                                      | 11.377(2)                                                       |
| $\beta$ /°                                                         | 90.2418(18)                                                     | 90                                                              | 104.136(4)                                                      | 104.04(3)                                                       |
| <i>V</i> /Å <sup>3</sup>                                           | 3298.81(12)                                                     | 6681.8(4)                                                       | 1421.64(12)                                                     | 1473.2 (6)                                                      |
| <i>Z</i>                                                           | 8                                                               | 16                                                              | 4                                                               | 4                                                               |
| <i>D<sub>c</sub></i> /g cm <sup>-3</sup>                           | 1.1743                                                          | 1.159                                                           | 1.362                                                           |                                                                 |
| reflns coll.                                                       | 12526                                                           | 5231                                                            | 8256                                                            |                                                                 |
| unique reflns                                                      | 3383                                                            | 3792                                                            | 2384                                                            |                                                                 |
| <i>R</i> <sub>int</sub>                                            | 0.0256                                                          | 0.0473                                                          | 0.0402                                                          |                                                                 |
| <i>R</i> <sub>1</sub> [ <i>I</i> > 2σ( <i>I</i> )] <sup>[a]</sup>  | 0.0368                                                          | 0.0661                                                          | 0.0463                                                          |                                                                 |
| <i>wR</i> <sub>2</sub> [ <i>I</i> > 2σ( <i>I</i> )] <sup>[b]</sup> | 0.1124                                                          | 0.1797                                                          | 0.1193                                                          |                                                                 |
| <i>R</i> <sub>1</sub> (all data)                                   | 0.0390                                                          | 0.0861                                                          | 0.0655                                                          |                                                                 |
| <i>wR</i> <sub>2</sub> (all data)                                  | 0.1143                                                          | 0.1932                                                          | 0.1319                                                          |                                                                 |
| GOF                                                                | 1.112                                                           | 1.088                                                           | 1.031                                                           |                                                                 |

<sup>a</sup>  $R_1 = \sum ||F_o| - |F_c|| / \sum |F_o|$ .

<sup>b</sup>  $wR_2 = \{ \sum w[(F_o)^2 - (F_c)^2]^2 / \sum w[(F_o)^2]^2 \}^{1/2}$
